# Supplementary material
Source: publisher figshare collection journal article supplement (https://frontiersin.figshare.com/ndownloader/files/14993216)

**Figure S3.** The ct-HSQC (a) has reduced sensitivity compared to the standard HSQC experiment (b): as illustrated here, the peak at 6.06/88.9 ppm is not visible in the ct-HSQC spectrum.

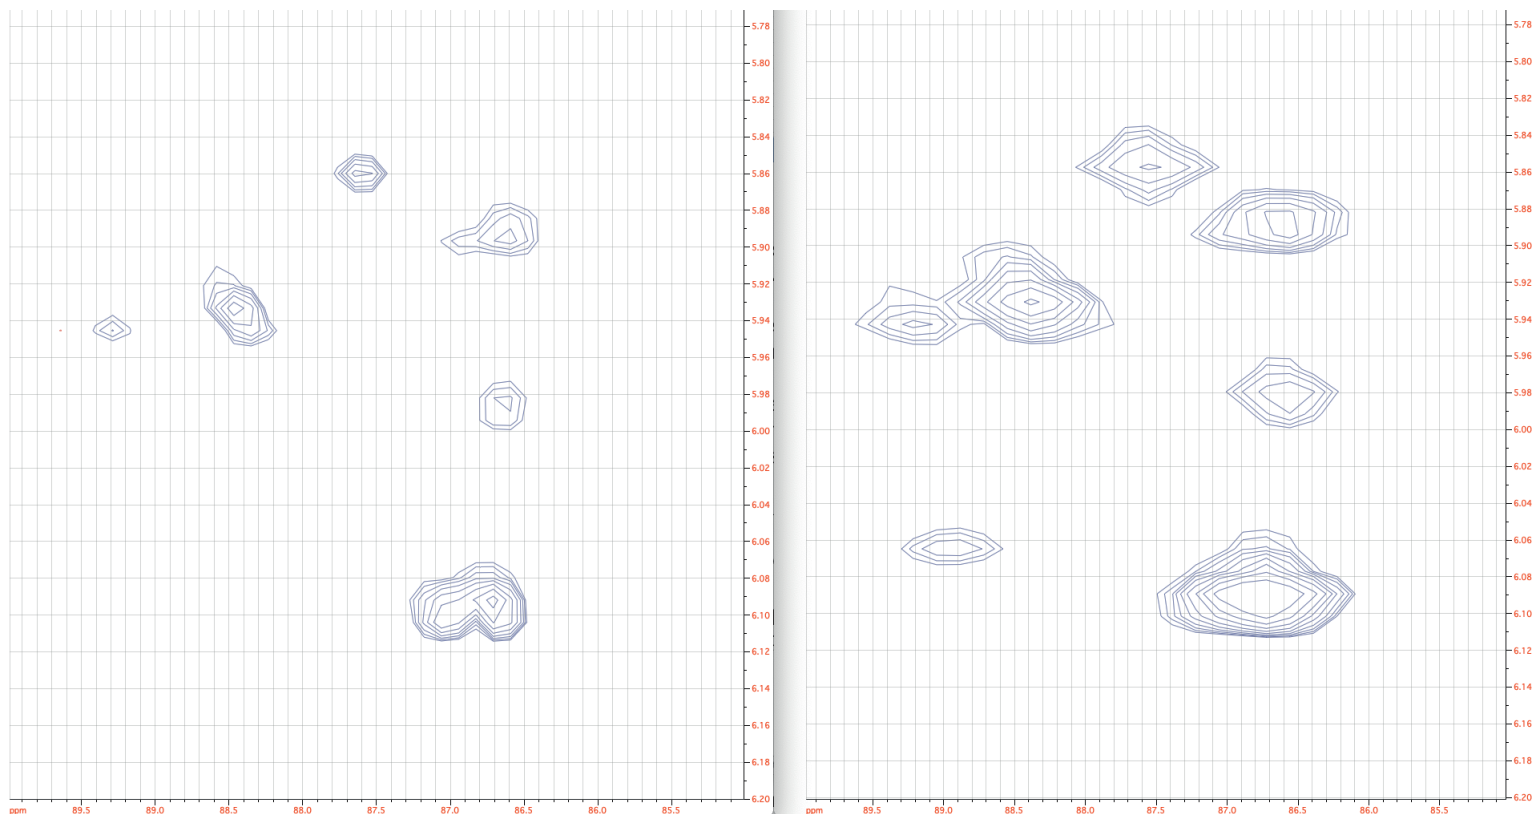

Supplement: Supplementary file [file 14993216]
